# Supplementary material for: Inorganic anion induced supramolecular architectures of flexible unsymmetrical bis(pyridyl) ionic salts mediated by various non-covalent interactions
Source: Royal Society of Chemistry journal article supplement (doi:10.1039/c3ce40227d), 2013-01-01
Supplement: c3ce40227d.pdf [file c3ce40227d.pdf]

Electronic Supplementary Information for CrystEngComm

This journal is (c) The Royal Society of Chemistry 2013

Electronic Supplementary Information (ESI)

**Inorganic anion induced supramolecular architectures of  
flexible unsymmetrical bis(pyridyl) ionic salts mediated by  
various noncovalent interactions**

**Zhu-Yan Zhang, Zhao-Peng Deng, Li-Hua Huo, Hui Zhao and Shan Gao**

Electronic Supplementary Information for CrystEngComm

This journal is (c) The Royal Society of Chemistry 2013

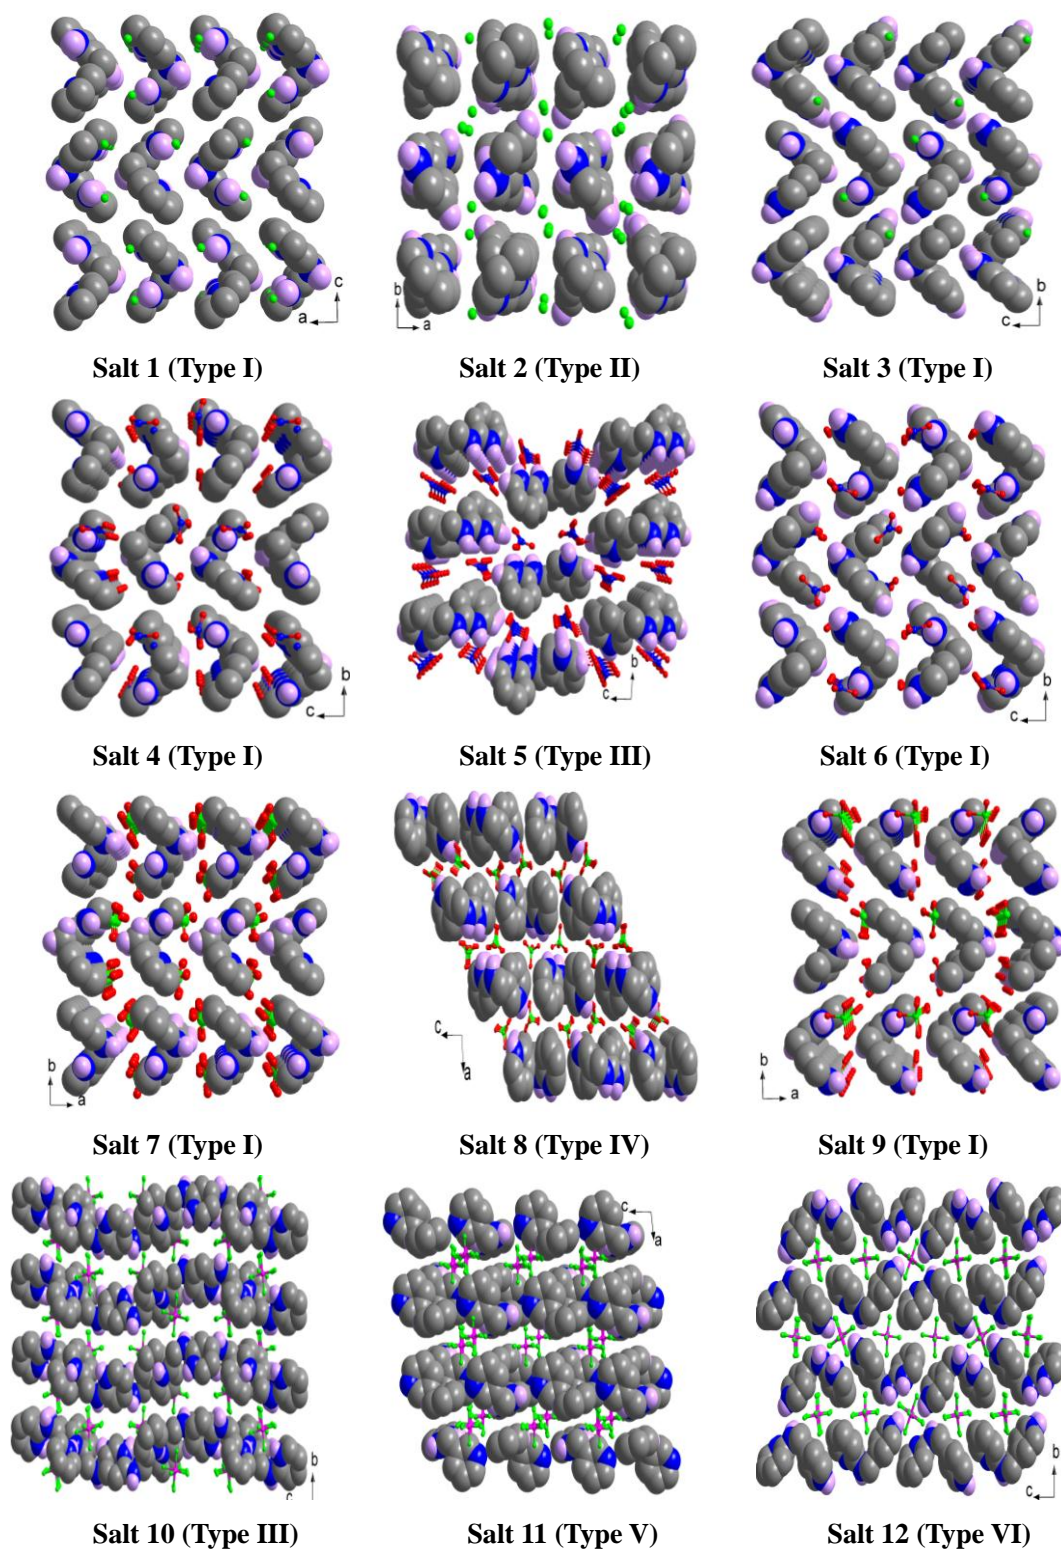

**Fig. S1** 3-D supramolecular architectures of salts **1-12** in space-filling modes.

Electronic Supplementary Information for CrystEngComm

This journal is (c) The Royal Society of Chemistry 2013

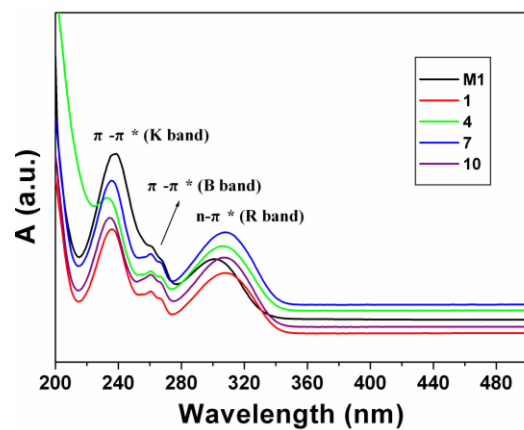

(a)

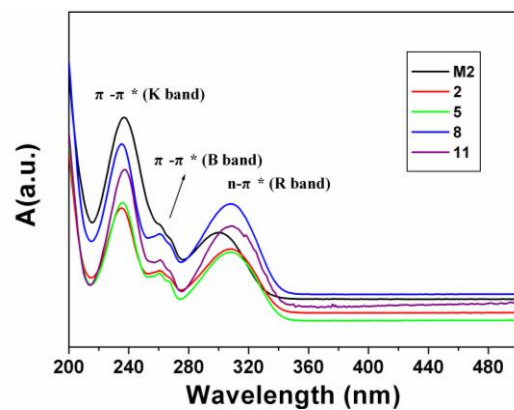

(b)

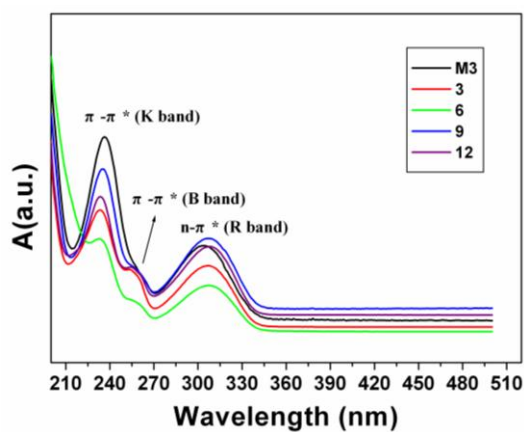

(c)

Fig. S2 UV spectra of M1-M3 and salts 1-12 in aqueous solution.

Electronic Supplementary Information for CrystEngComm

This journal is (c) The Royal Society of Chemistry 2013

### **Powder X-ray diffraction (PXRD)**

Powder X-ray diffraction (PXRD) patterns for solid samples of salts **1-12** are measured at room temperature as illustrated in Fig. S3. The patterns are highly similar to their simulated ones (based on the single-crystal X-ray diffraction data), indicating that the single-crystal structures are really representative of the bulk of the corresponding samples.

### **Thermogravimetric analysis (TGA)**

The thermal stability of the twelve salts were analyzed on crystalline samples by thermogravimetric analyses (TGA) from room temperature to 600 °C at a rate of 10 °C min<sup>-1</sup> under pure atmosphere. As shown in Fig. S4, the thermal stability of the hexafluorophosphates is similar to that of the chlorates, which is lower than the thermal stability of the perchlorates but higher than the corresponding nitrates. The sharp weight loss of the twelve salts is falling in the range of 162-320 °C, 160-322 °C, 157-364 °C, 143-258 °C, 130-205 °C, 122-147 °C, 223-348 °C, 227-342 °C, 208-344 °C, 162-280 °C, 156-311 °C, and 160-315 °C, respectively.

Electronic Supplementary Information for CrystEngComm

This journal is (c) The Royal Society of Chemistry 2013

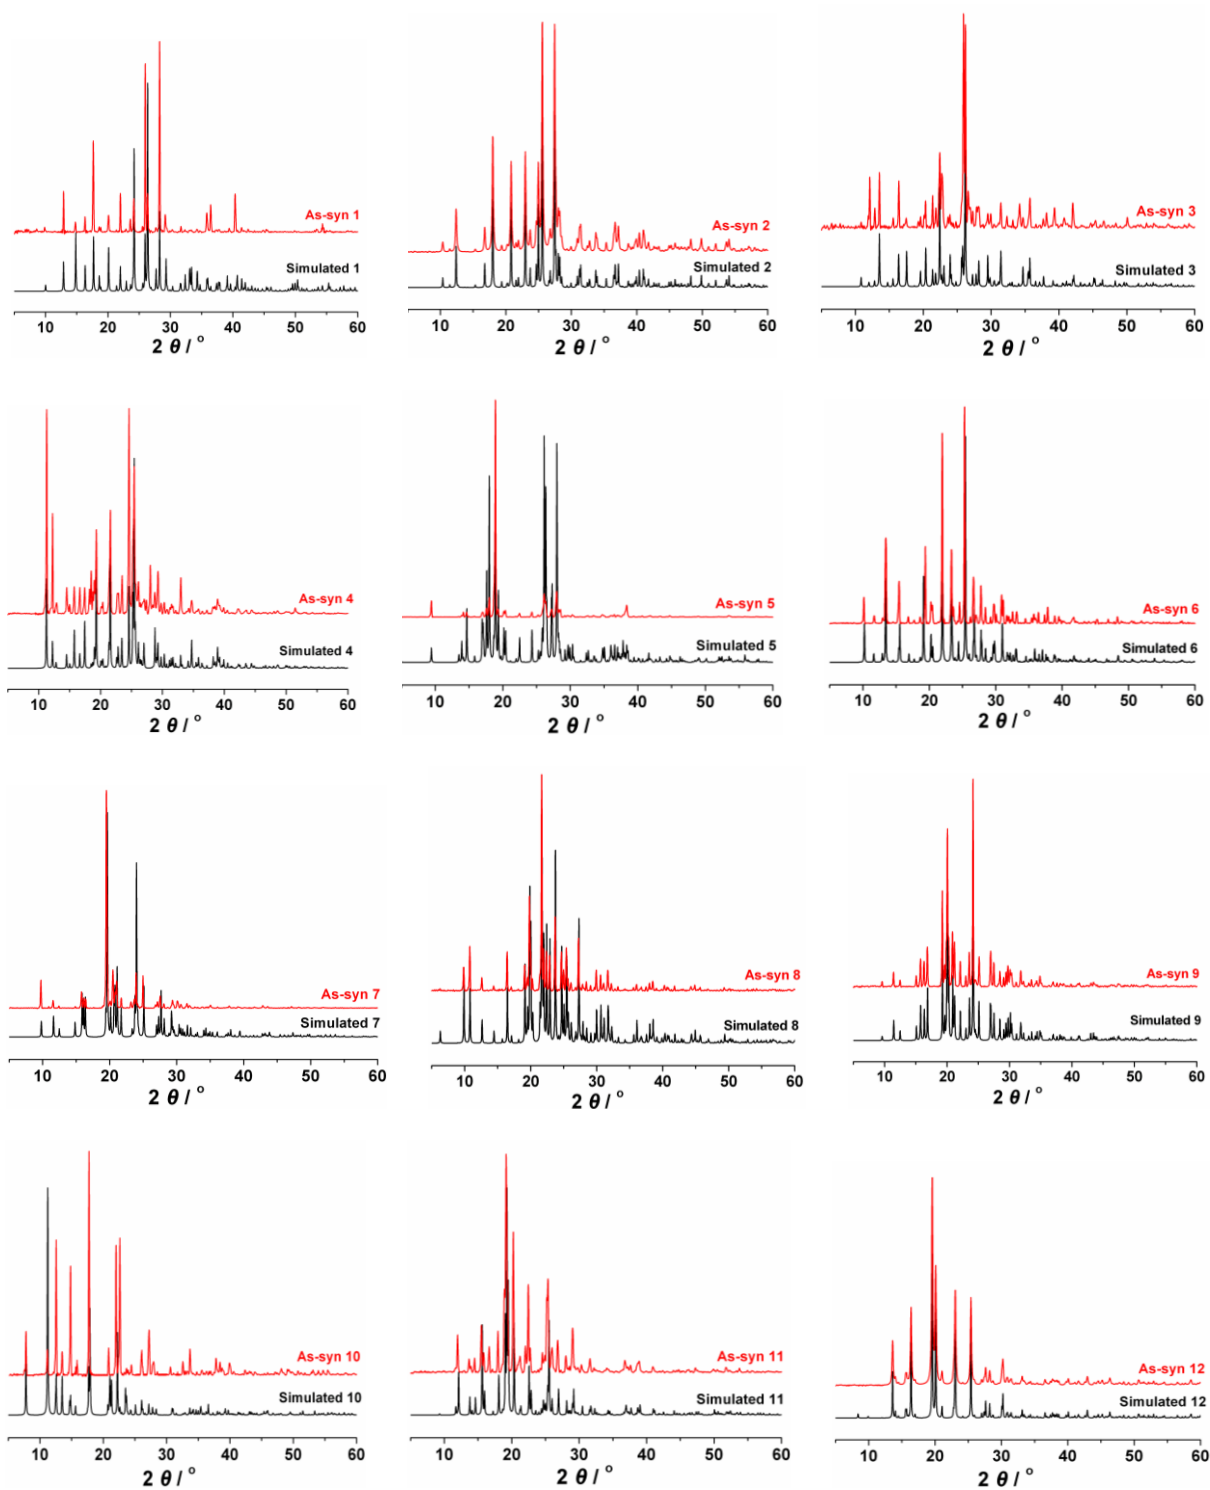

Fig. S3 PXRD patterns for salts 1-12.

Electronic Supplementary Information for CrystEngComm

This journal is (c) The Royal Society of Chemistry 2013

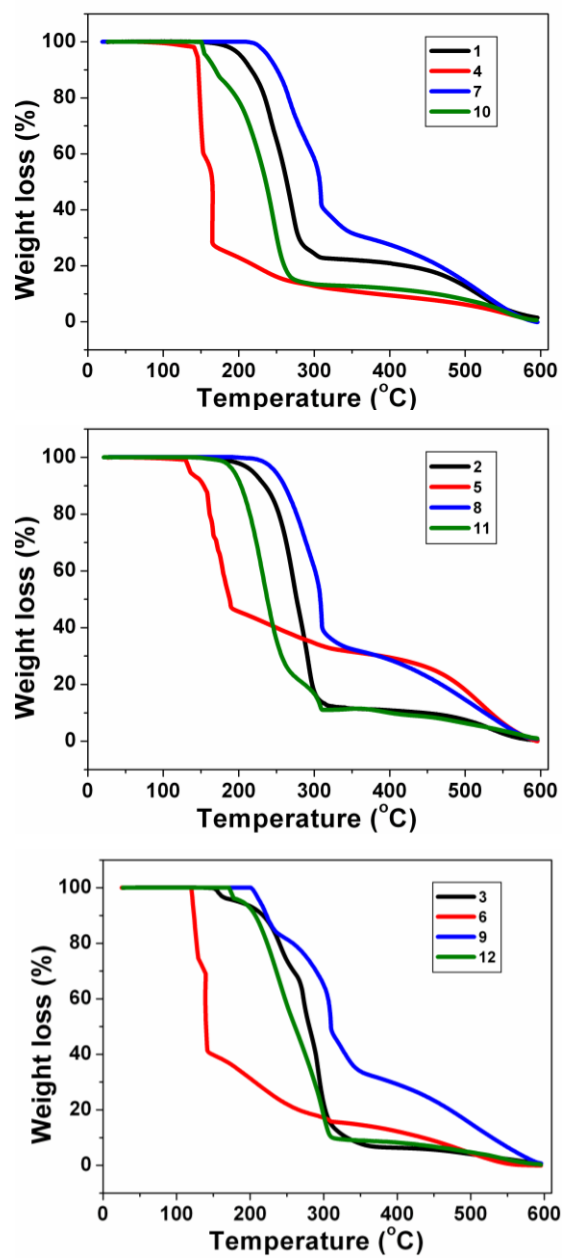

Fig. S4 TG curves of salts 1-12 at pure atmosphere.
